# Supplementary material
Source: PubMed Central journal article supplement (PMC8799511)
Supplement: NIHMS1762028-supplement-1.pdf [file NIHMS1762028-supplement-1.pdf]

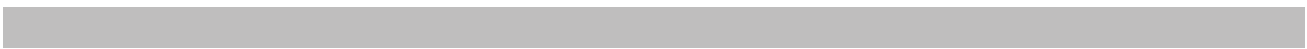

**SUPPLEMENTAL TABLES**

Supplemental Table A: Demographics of Subjects in Matched Cohort

|                                             | ARDS+CA (n=25)    | ARDS (n=25)     | p-value |
|---------------------------------------------|-------------------|-----------------|---------|
| <b>Demographics</b>                         |                   |                 |         |
| Age (years)                                 | 7.9 (3.2, 13)     | 9 (3.3, 14.2)   | 0.839   |
| Weight (kg)                                 | 24 (14, 36)       | 32 (14, 50)     | 0.229   |
| Male gender                                 | 12 (48.0%)        | 14 (56.0%)      | 0.778   |
| Race & Ethnicity                            |                   |                 | 1.000   |
| White                                       | 11 (44.0%)        | 11 (44.0%)      |         |
| Black                                       | 8 (32.0%)         | 9 (36.0%)       |         |
| Hispanic                                    | 3 (12.0%)         | 3 (12.0%)       |         |
| Asian                                       | 0                 | 1 (4.0%)        |         |
| Other                                       | 2 (8.0%)          | 2 (8.0%)        |         |
| Co-Morbidities                              |                   |                 |         |
| None                                        | 15 (60.0%)        | 14 (56.0%)      | 1.000   |
| Prematurity                                 | 2 (8.0%)          | 2 (8.0%)        | 1.000   |
| Cerebral palsy                              | 6 (24.0%)         | 3 (12.0%)       | 0.463   |
| Epilepsy                                    | 2 (8.0%)          | 3 (12.0%)       | 1.000   |
| Genetic syndrome                            | 2 (8.0%)          | 1 (4.0%)        | 1.000   |
| Hematologic disease                         | 1 (4.0%)          | 0               | 1.000   |
| Solid cancer                                | 0                 | 0               | ---     |
| Liquid cancer                               | 1 (4.0%)          | 3 (12.0%)       | 0.609   |
| Stem cell transplant                        | 0                 | 2 (8.0%)        | 0.490   |
| Chronic lung disease                        | 0                 | 1 (4.0%)        | 1.000   |
| Organ transplant                            | 0                 | 0               | ---     |
| Rheumatologic disease                       | 0                 | 0               | ---     |
| Immunologic disease                         | 0                 | 0               | ---     |
| Immunosuppressed                            | 2 (8.0%)          | 2 (8.0%)        | 1.000   |
| <b>ARDS Characteristics</b>                 |                   |                 |         |
| ARDS Category                               |                   |                 | 0.008   |
| Viral pneumonia                             | 2 (8.0%)          | 3 (12.0%)       |         |
| Aspiration pneumonia                        | 11 (44.0%)        | 7 (28.0%)       |         |
| Bacterial pneumonia                         | 0                 | 3 (12.0%)       |         |
| Fungal pneumonia                            | 0                 | 0               |         |
| Sepsis                                      | 1 (4.0%)          | 8 (32.0%)       |         |
| Trauma                                      | 2 (8.0%)          | 3 (12.0%)       |         |
| Medication-related                          | 1 (4.0%)          | 0               |         |
| TRALI                                       | 1 (4.0%)          | 0               |         |
| Drowning                                    | 4 (16.0%)         | 0               |         |
| Smoke inhalation                            | 1 (4.0%)          | 0               |         |
| Pancreatitis                                | 0                 | 1 (4.0%)        |         |
| Cardiac arrest                              | 2 (8.0%)          | 0               |         |
| PRISM III @ 12H                             | 24 (21, 31)       | 24 (20, 29)     | 0.808   |
| Initial PaO <sub>2</sub> /FiO <sub>2</sub>  | 93 (67, 148)      | 126 (63, 154)   | 0.756   |
| Initial OI                                  | 23.7 (11.4, 38.1) | 15.8 (11, 28.8) | 0.290   |
| Worst mPaw in 24 hours (cmH <sub>2</sub> O) | 16 (14.5, 21)     | 14 (13, 19)     | 0.077   |
| iNO within 72 hours                         | 13 (52.0%)        | 7 (28.0%)       | 0.148   |
| Vasoactive Use at 72 hours                  |                   |                 |         |
| # of vasopressors                           | 1 (1, 2)          | 1 (1, 2)        | 0.509   |
| VIS                                         | 20 (12, 32)       | 15 (5, 38)      | 0.392   |
| Ventilator days                             | 7 (5, 15)         | 8 (5, 12)       | 0.938   |

| Outcomes                   |            |            |       |
|----------------------------|------------|------------|-------|
| ECMO                       |            |            | 1.00  |
| <i>VV</i>                  | 2 (8.0%)   | 2 (8.0%)   |       |
| <i>VA</i>                  | 1 (4.0%)   | 0          |       |
| PICU length of stay (days) | 11 (5, 24) | 12 (7, 19) | 0.620 |
| PICU death                 | 13 (52.0%) | 2 (8.0%)   | 0.001 |

Supplemental Table B: Matched Cohort\* Biomarker Comparison between ARDS+CA and ARDS Cohorts

| Biomarker           | ARDS+CA (n=25)                | ARDS (n=25)                   | p-value |
|---------------------|-------------------------------|-------------------------------|---------|
| Ang2 (pg/mL)        | 6749.348 (4914.249, 14718.99) | 12654.42 (4744.369, 20871.66) | 0.184   |
| sRAGE (pg/mL)       | 6746.867 (3607.563, 10609.57) | 2863.456 (1668.454, 5204.645) | 0.022   |
| Nucleosomes         | 0.242 (0.167, 0.493)          | 0.182 (0.095, 0.491)          | 0.410   |
| SP-D (ng/mL)        | 15.456 (10.017, 25.772)       | 10.794 (7.098, 18.422)        | 0.031   |
| CCL22 (pg/mL)       | 896.36 (688.11, 1060.86)      | 592.85 (458.72, 831.82)       | 0.032   |
| CCL7 (pg/mL)        | 7.83 (4.98, 27.21)            | 13.41 (5.99, 61.45)           | 0.388   |
| IL-6 (pg/mL)        | 750.76 (107.22, 2365.04)      | 440.98 (169.07, 1696.6)       | 0.691   |
| TNFR1 (pg/mL)       | 1949.51 (1360.43, 3633.45)    | 3074.39 (1825.69, 6283.94)    | 0.079   |
| TNF-alpha (pg/mL)   | 12.9 (9.36, 34.45)            | 17.6 (13.54, 39.36)           | 0.211   |
| OFM4 (ng/mL)        | 2.95 (1.39, 9.26)             | 10.65 (4.41, 21.85)           | 0.010   |
| Granzyme B (pg/mL)  | 8.67 (3.39, 25.22)            | 8.76 (3.53, 55.69)            | 0.497   |
| HSP70 (pg/mL)       | 290646 (161560.1, 770888.3)   | 305184 (155130.9, 611057.6)   | 0.946   |
| IL-1a (pg/mL)       | 0.33 (0.12, 0.75)             | 0.12 (0.12, 1.55)             | 0.619   |
| IL-8 (pg/mL)        | 200.83 (105.57, 484.88)       | 179.62 (70.82, 983.51)        | 0.662   |
| CCL3/MIP-1a (pg/mL) | 34.56 (14.9, 68.8)            | 31.68 (17.86, 59.8)           | 0.676   |
| MIP-1b (pg/mL)      | 60.96 (40.51, 92.14)          | 60.32 (32.99, 88.13)          | 0.742   |
| MMP8 (pg/mL)        | 9044.57 (2460.6, 15526.64)    | 10033.34 (3684.13, 66904.84)  | 0.232   |

\*Matching based on PRSIM III score (+/- 2), immunosuppression (yes/no) and age.
